# Supplementary material
Source: PubMed Central journal article supplement (PMC4335894)
Supplement: AAC.03554-14_zac002153667so1.pdf [file AAC.03554-14_zac002153667so1.pdf]

Table S1. Novel *pfmdr1* SNPs and the *pfprt* and *pfmdr1* haplotypes found with them in samples collected in 2011.

| Haplotype | Number | <i>pfprt</i> |      |       | <i>pfmdr1</i>  |                |                |                |                |                       |
|-----------|--------|--------------|------|-------|----------------|----------------|----------------|----------------|----------------|-----------------------|
|           |        | K76T         | N86Y | Y184F | T1069T         | S1082A         | T1158T         | N1199L         | D1241N         | N1243N                |
| 1         | 1      | KT           | N    | Y     | T (act)        | <b>A (gcc)</b> | T (aca)        | N (aat)        | D (gat)        | N (aac)               |
| 2         | 1      | K            | N    | F     | T (act)        | <b>A (gcc)</b> | T (aca)        | N (aat)        | D (gat)        | N (aac)               |
| 3         | 1      | T            | Y    | F     | T (act)        | S (tcc)        | <b>T (acg)</b> | N (aat)        | D (gat)        | N (aac)               |
| 4         | 1      | K            | Y    | F     | T (act)        | S (tcc)        | T (aca)        | <b>L (aag)</b> | D (gat)        | N (aac)               |
| 5         | 1      | K            | N    | Y     | T (act)        | S (tcc)        | T (aca)        | <b>L (aag)</b> | D (gat)        | N (aac)               |
| 6         | 1      | K            | N    | F     | T (act)        | S (tcc)        | T (aca)        | <b>L (aag)</b> | D (gat)        | N (aac)               |
| 7         | 1      | T            | N    | †     | T (act)        | S (tcc)        | T (aca)        | <b>L (aag)</b> | D (gat)        | N (aac)               |
| 8         | 1      | T            | N    | F     | T (act)        | S (tcc)        | T (aca)        | <b>L (aag)</b> | D (gat)        | N (aac)               |
| 9         | 1      | KT           | Y    | F     | T (act)        | S (tcc)        | T (aca)        | N (aat)        | <b>N (aat)</b> | N (aac)               |
| 10        | 1      | K            | N    | F     | <b>T (acg)</b> | S (tcc)        | T (aca)        | N (aat)        | <b>N (aat)</b> | N (aac)               |
| 11        | 1      | K            | N    | F     | T (act)        | S (tcc)        | T (aca)        | N (aat)        | D (gat)        | <b><u>N (aat)</u></b> |

Synonymous SNPs are written in bold. The *pfmdr1* 1034, 1042 and 1246 haplotype was SND in all the above samples.

† =Not determined
